# Supplementary material for: The Health Status of the US Veterans: A Longitudinal Analysis of Surveillance Data Prior to and during the COVID-19 Pandemic
Source: MDPI journal article supplement (doi:10.3390/healthcare11142049), 2023-07-17
Supplement: s1 [file s1]

# **The Health Status of the US Veterans: A Longitudinal Analysis of Surveillance Data Prior to and during the COVID-19 Pandemic**

## **Supplementary Material**

**Supplementary Figure S1.** Odds Ratios by Disease by Age Group (excludes Mental Health).

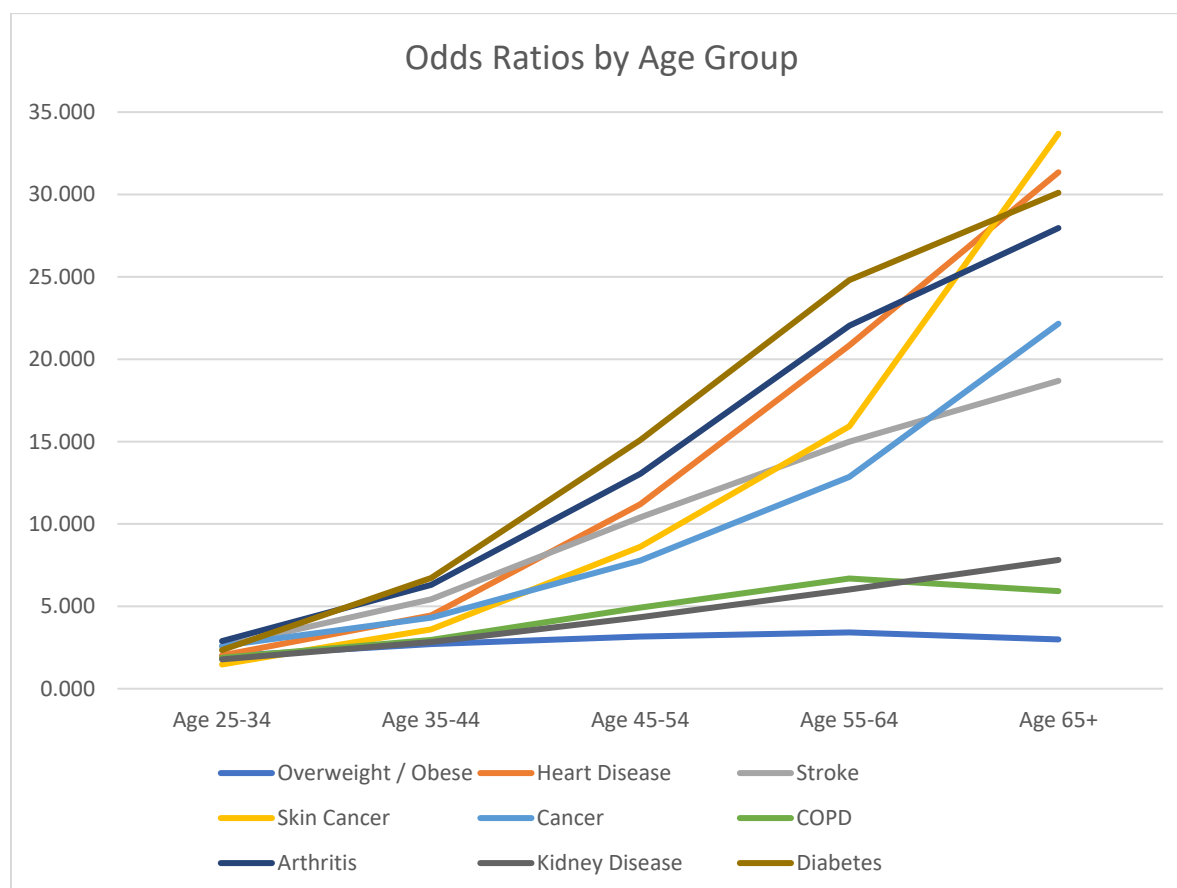

**Supplementary Figure S1.** Odds Ratios by Disease by Age Group (excludes Mental Health).
